# Supplementary material for: Cytotoxic Effect of Rosmarinus officinalis Extract on Glioblastoma and Rhabdomyosarcoma Cell Lines
Source: MDPI journal article supplement (doi:10.3390/molecules27196348), 2022-09-26
Supplement: s1 [file s1]

# Cytotoxic Effect of *Rosmarinus officinalis* Extract on Glioblastoma and Rhabdomyosarcoma Cell Lines

Eleni Kakouri <sup>1</sup>, Olti Nikola <sup>2</sup>, Charalabos Kanakis <sup>1</sup>, Kyriaki Hatziaapiou <sup>2,3</sup>, George I. Lambrou <sup>2</sup>, Panayiotis Trigas <sup>4</sup>, Christina Kanaka-Gantenbein <sup>2</sup> and Petros A. Tarantilis <sup>1,\*</sup>

<sup>1</sup> Laboratory of Chemistry, Department of Food Science & Human Nutrition, School of Food and Nutritional Sciences, Agricultural University of Athens, Iera Odos 75, 11855 Athens, Greece

<sup>2</sup> Choremeio Research Laboratory, First Department of Pediatrics, National and Kapodistrian University of Athens, Thivon & Levadias 8, 11527 Athens, Greece

<sup>3</sup> Physiotherapy Department, Faculty of Health and Care Sciences, State University of West Attica, Agiou Spiridonos 28, 12243 Athens, Greece

<sup>4</sup> Laboratory of Systematic Botany, Department of Crop Science, School of Plant Sciences, Agricultural University of Athens, Iera Odos 75, 11855 Athens, Greece

\* Correspondence: ptara@aua.gr; Tel.: +30-210-529-4262

## Detailed Description of the ms/ms Fragmentation Process

The low energy CID MS/MS spectrum of the precursor protonated molecule  $[M+H]^+$  at  $m/z$  343.1023 (compound 1) afforded a product ion at  $m/z$  181.0501 which indicated the loss of a hexose moiety, revealing simultaneously the presence of caffeic acid which was confirmed by further fragment ions at  $m/z$  163.0387, at  $m/z$  145.0273 and at  $m/z$  135.0428. Compound 1 was identified as caffeic acid hexoside.

Similarly, the low energy CID MS/MS spectrum of the precursor protonated molecule  $[M+H]^+$  at  $m/z$  181.0496 afforded similar fragment ions, namely, at  $m/z$  163.0385, at  $m/z$  145.0271, at  $m/z$  135.0444, at  $m/z$  117.0328. Compound 2 was identified as caffeic acid.

The product ion scan of the precursor protonated molecule  $[M+H]^+$  at  $m/z$  355.1023 afforded a product ion at  $m/z$  163.0385. The loss in 192.0638 Da was attributed to a quinic acid moiety, while the presence of the fragment ion at  $m/z$  163.0385 confirmed the presence of caffeic acid. Compound 3 was identified as chlorogenic acid, which was further supported by the presence of product ions at  $m/z$  145.0264 and at  $m/z$  135.0424.

The product ion scan of the precursor protonated molecule  $[M+H]^+$  at  $m/z$  227.1278 afforded product ions at  $m/z$  209.1138, at  $m/z$  191.1068 and at  $m/z$  163.1114 formed by consecutive losses of two -OH groups and a -C=O group, respectively. A product ion at  $m/z$  149.0949 was obtained derived from the loss of a -CH<sub>3</sub> group  $[M+H-163.1114-CH_3]^+$  and at  $m/z$  95.0472, was produced by the cleavage of a pentane moiety. According to the molecular formula of Compound 4, as generated by the MassHunter WorkStation software  $[C_{12}H_{18}O_4]$ , it was identified as tuberonic acid.

The low energy CID MS/MS spectrum of the precursor protonated molecule  $[M+H]^+$  at  $m/z$  479.1181 afforded a product ion at  $m/z$  317.0648 formed by the loss of a hexose moiety at  $m/z$  302.0425  $[M+H-CH_3]^+$  and at  $m/z$  163.0381 formed by the cleavage of the <sup>0,2</sup>A<sup>+</sup> ring. According to the molecular formula of compound 5  $[C_{22}H_{22}O_{12}]$ , it was identified as rhamnetin hexoside.

The product ion scan of the precursor protonated molecule  $[M+H]^+$  at  $m/z$  611.1968 afforded a product ion at  $m/z$  303.0857 derived from the loss of two sugar moieties, a hexose and a pentose. Further product ions at  $m/z$  285.0757  $[M+H-308.1111-H_2O]^+$ , at  $m/z$  195.0284 [<sup>0,4</sup>B<sup>+</sup> cleavage] and at  $m/z$  153.0180 [<sup>1,3</sup>A<sup>+</sup> cleavage] allowed the identification of Compound 6 as hesperidin.

The low energy CID MS/MS spectrum of the precursor protonated molecule  $[M+H]^+$  at  $m/z$  433.1129 afforded a product ion at  $m/z$  271.0602 derived from the cleavage of a hexose moiety. The derived ion was suggested to belong to apigenin and this was supported

by the presence of the product ion at  $m/z$  119.0468 which derived from the  $^{1,3}B^+$  ring cleavage. Compound **7** was identified as apigenin glucoside.

The product ion scan of the precursor protonated molecule  $[M+H]^+$  at  $m/z$  609.1821 afforded a product ion at  $m/z$  463.1221 and at  $m/z$  301.0702 derived from consecutive losses of a deoxyhexose and a hexose moieties, followed by a product ion at  $m/z$  269.0288 produced by the loss of a  $-CH_3O$  group. The aglycon part was identified as hispidulin and Compound **8** was tentatively identified as hispidulin rutinoside.

The product ion scan of the precursor protonated molecule  $[M+H]^+$  at  $m/z$  361.0918 afforded a product ion at  $m/z$  181.0473 and at  $m/z$  163.0386  $[M+H-181.0473-H_2O]^+$  and at  $m/z$  135.0431 derived from cleavage of the 8C-9C bond and giving rise to dihydrocaffeic acid. According to literature data and available authentic standard solution, Compound **10** was identified as rosmarinic acid.

The low energy CID MS/MS spectrum of the precursor protonated molecule  $[M+H]^+$  at  $m/z$  163.0392 afforded a product ion at  $m/z$  145.0279 derived from the loss of a  $H_2O$  molecule. Further product ions at  $m/z$  117.0331 and at  $m/z$  89.039 were produced by the loss of a  $-CO$  and a  $OH$  group from position 7 of the benzene ring. Compound **11** was identified as umbeliferone.

The low energy CID MS/MS spectrum of the precursor protonated molecule  $[M+H]^+$  at  $m/z$  477.1395 afforded a product ion at  $m/z$  315.0861 derived from the loss of a hexose moiety. Based on further product ions at  $m/z$  300.0861  $[M+H-hexose-CH_3]^+$  and at  $m/z$  282.0507  $[M+H-hexose-H_2O]^+$  and on literature data, Compound **14** was identified as cirsimaritin hexoside.

Similar fragmentation as for compound 14, presented also for compound **15**, regarding the aglycon part. Thus, compound **15** was identified as cirsimaritin.

The product ion scan of the precursor protonated molecule  $[M+H]^+$  at  $m/z$  347.1855 afforded the following product ions: at  $m/z$  301.1785 and at  $m/z$  283.1676 derived from the loss of a  $-CHO_2$  and a water molecule, respectively. According to literature data, Compound **16** was identified as rosmanol.

Mass spectra of *Rosmarinus officinalis* L. extract allowed the identification of a compound analogue of umbelliferone. The low energy CID MS/MS spectrum of the precursor protonated molecule  $[M+H]^+$  at  $m/z$  177.0546 afforded a product ion at  $m/z$  149.0230 derived from the loss of a  $-C_2H_3$  group. Another fragment ion at  $m/z$  93.0310 produced by the cleavage at position 8C-9C, helped in identifying compound **17** as methylumbelliferone.

Compound **18** was tentatively identified as salvigenin. The low energy CID MS/MS spectrum of the precursor protonated molecule  $[M+H]^+$  at  $m/z$  329.1020 afforded two product ions at  $m/z$  296.0680 and at  $m/z$  268.0727 which were formed by consecutive losses of two  $-CH_3O$  groups.

The low energy CID MS/MS spectrum of the precursor protonated molecule  $[M+H]^+$  at  $m/z$  331.1900 afforded a product ion at  $m/z$  285.1844 derived from the loss of a  $-CHO_2$  group and a product ion at  $m/z$  243.1364 derived from the cleavage of a propene moiety. According to literature data, Compound **21** was identified as carnosol. One more isomer of carnosol was identified (Compound **22**).

The low energy CID MS/MS spectrum of the precursor protonated molecule  $[M+H]^+$  at  $m/z$  317.2112 afforded a product ion at  $m/z$  299.1998  $[M+H-OH]^+$  and at  $m/z$  285.1872  $[M+H-32.0240]$  formed by the loss of two methyl groups and at  $m/z$  281.1906  $[M+H-H_2O-OH]$ . Compound **23** was identified as rosmaridiphenol.

The low energy CID MS/MS spectrum of the precursor deprotonated molecule  $[M-H]^-$  at  $m/z$  521.1292 afforded a product ion at  $m/z$  359.0800 derived from the loss of a hexose moiety. The aglycon part remained bearing the molecular formula  $C_{18}H_{15}O_8$  was identified as rosmarinic acid and this was further confirmed by subsequent product ions at  $m/z$  179.0334 and at  $m/z$  133.0305, which were similar to those of the ESI(+). Compound **9** was identified as rosmarinic acid hexoside.

The low energy CID MS/MS spectrum of the precursor deprotonated molecule  $[M-H]^-$  at  $m/z$  503.0826 afforded a main product ion at  $m/z$  285.0390 after a minor fragment ion at  $m/z$  399.0726 formed by the loss of an acetate and a carboxylic acid group. Further minor fragment ions at  $m/z$  199.0381, at  $m/z$  151.0016 and at  $m/z$  133.0285 formed by the loss of  $C_2H_2O$  and  $CO_2$  groups and cleavage of the  $^{1,3}A^-$  and  $^{1,3}B^-$  rings, respectively. Compound **12** was identified as luteolin acetyl glucuronide.

The product ion scan of the precursor deprotonated molecule  $[M-H]^-$  at  $m/z$  373.0922 presented the molecular formula  $C_{19}H_{18}O_8$ . Fragmentation pathway was similar to that of rosmarinic acid; consequently, Compound **13** was identified as methyl rosmarinic acid.

The low energy CID MS/MS spectrum of the precursor deprotonated molecule  $[M-H]^-$  at  $m/z$  343.1544 afforded a main product ion at  $m/z$  300.0996 formed by the loss of three methyl groups. Compound **19** was identified as rosmadial.

The product ion scan of the precursor deprotonated molecule  $[M-H]^-$  at  $m/z$  359.1859 afforded a product ion at  $m/z$  329.1742  $[M-H-CH_2O]$  at  $m/z$  285.1781 and at  $m/z$  283.1695. Compound **20** was identified as epirosmanol methyl ether.
